# Supplementary material
Source: publisher site journal article supplement (https://www.dovepress.com/get_supplementary_file.php?f=451725.docx)
Supplement: Supplementary file 1 [file get_supplementary_file.php]

**Supplemental content for**

**Different impacts of traffic-related air pollution on early-onset and late-onset asthma**

Ting-Yu Lin1,2, Firdian Makrufardi3,4, Nguyen Thanh Tung3,5, Amja Manullang3, Po-Jui Chang1,2, Chun-Yu Lo1,2, Tzu-Hsuan Chiu1, Pi-Hung Tung1, Chiung-Hung Lin1, Horng-Chyuan Lin1,2, Chun-Hua Wang1,2, and Shu-Min Lin1,2

1 Department of Thoracic Medicine, Chang Gung Memorial Hospital, Taipei, Taiwan

2 College of Medicine, Chang Gung University, Taoyuan, Taiwan

3 International Ph.D. Program in Medicine, College of Medicine, Taipei Medical University, Taipei, Taiwan

4 Department of Child Health, Faculty of Medicine, Public Health, and Nursing, Universitas Gadjah Mada – Dr. Sardjito Hospital, Yogyakarta, Indonesia

5 Otorhinolaryngology Department, Cho Ray Hospital, Ho Chi Minh City, Vietnam

***Corresponding Authors**

Shu-Min Lin, MD

Department of Thoracic Medicine, Chang Gung Memorial Hospital. 199 Tun-Hwa N. Rd., Taipei, Taiwan.

Fax: 886 33272474. E-mail: smlin100@gmail.com

**List of Tables**

**Table S1. Associations between PM10 exposure levels and asthma features among patients with EOA or LOA 2**

**Table S2. Associations between PM2.5 exposure levels and asthma features among patients with EOA or LOA 4**

**Table S3. Associations between NO2 exposure levels and asthma features among patients with EOA or LOA 6**

**Table S4. Associations between O3 exposure levels and asthma features among patients with EOA or LOA 8**

**Table S5. Associations between PM10 and asthma features among patients with EOA of LOA as a function of atopy status 10**

**Table S6. Associations between PM2.5 exposure levels and asthma features among patients with EOA or LOA as a function of atopy status 14**

**Table S7. Associations between NO2 exposure levels and asthma features among patients with EOA or LOA as a function of atopy status 18**

**Table S8. Associations between O3 exposure levels and asthma features among patients with EOA or LOA as a function of atopy status 22**

**Table S1. Associations between PM10 exposure levels and asthma features among patients with EOA or LOA**

| Early onset (N=260) | | | | | | | | |
| --- | --- | --- | --- | --- | --- | --- | --- | --- |
| Mean level of PM10 (μg/m3) | 1-month: 27.60 ± 7.47 | | | 6-month: 29.38 ± 7.04 | | 12-month: 30.63 ± 6.48 | | |
|  | | **β** | **Confidence Interval** | **β** | **Confidence Interval** | **β** | **Confidence Interval** | |
| Age of onset | | -.161 | -.361 ~ .038 | -.316 | -.532 ~ -.100 | -.258 | -.490 ~ -.025 | |
| Asthma duration | | .161 | -.038 ~ .361 | .316 | .100 ~ .532 | .258 | .025 ~ .490 | |
| **Blood tests** | |  |  |  |  |  |  | |
| IgE level, KU/L | | -.093 | -6.872 ~ 6.686 | -2.782 | -10.196 ~ 4.632 | -5.985 | -13.885 ~ 1.915 | |
| Eosinophils, % | | -.003 | -.050 ~ .043 | -.018 | -.070 ~ .033 | -.024 | -.079 ~ .030 | |
| Eosinophils, count | | -2.269 | -6.149 ~ 1.611 | -2.340 | -6.589 ~ 1.909 | -4.047 | -8.572 ~ .479 | |
| ECP | | -.004 | -.341 ~ .333 | .220 | -.148 ~ .589 | .088 | -.307 ~ .483 | |
| **Lung function** | |  |  |  |  |  |  | |
| FVC, L | | -.015 | -.036 ~ .006 | -.015 | -.038 ~ .008 | -.011 | -.036 ~ .013 | |
| FVC, % | | -.437 | -.929 ~ .055 | -.328 | -.868 ~ .212 | -.172 | -.751 ~ .407 | |
| FEV1, L | | -.017 | -.035 ~ .001 | -.019 | -.039 ~ .001 | -.016 | -.038 ~ .005 | |
| FEV1, % | | -.627 | -1.109 ~ -.145 | -.534 | -1.065 ~ -.003 | -.422 | -.992 ~ .147 | |
| FEV1/FVC, % | | -.581 | -1.014 ~ -.149 | -.447 | -.924 ~ .030 | -.399 | -.911 ~ .112 | |
| FEV1, % change | | -.087 | -.294 ~ .120 | -.124 | -.350 ~ .102 | -.101 | -.343 ~ .141 | |
| **ACT** | | -0.038 | -0.114 ~ 0.038 | -0.004 | -0.092 ~ 0.084 | -0.008 | | -0.102 ~ 0.085 |
| Late onset (N=415) | | | | | | | | |
| Mean level of PM10 (μg/m3) | 1-month: 27.54 ± 8.16 | | | 6-month: 28.44 ± 6.96 | | 12-month: 30.19 ± 6.82 | | |
|  | | **β** | **Confidence Interval** | **β** | **Confidence Interval** | **β** | **Confidence Interval** | |
| Age of onset | | .098 | .017 ~ .180 | .062 | -.035 ~ .158 | .095 | -.003 ~ .193 | |
| Asthma duration | | -.098 | -.180 ~ -.017 | -.062 | -.158 ~ .035 | -.095 | -.193 ~ .003 | |
| **Blood tests** | |  |  |  |  |  |  | |
| IgE level, KU/L | | -1.493 | -6.937 ~ 3.952 | -1.369 | -7.779 ~ 5.042 | -1.867 | -8.415 ~ 4.681 | |
| Eosinophils, % | | -.027 | -.057 ~ .002 | -.031 | -.066 ~ .004 | -.037 | -.072 ~ -.001 | |
| Eosinophils, count | | -2.466 | -4.856 ~ -.076 | -3.801 | -6.605 ~ -.997 | -4.160 | -7.021 ~ -1.300 | |
| ECP | | -.055 | -.210 ~ .100 | -.115 | -.297 ~ .068 | -.125 | -.311 ~ .062 | |
| **Lung function** | |  |  |  |  |  |  | |
| FVC, L | | -.007 | -.016 ~ .002 | -.007 | -.018 ~ .004 | -.004 | -.015 ~ .007 | |
| FVC, % | | -.065 | -.345 ~ .215 | -.246 | -.575 ~ .083 | -.089 | -.426 ~ .248 | |
| FEV1, L | | -.004 | -.012 ~ .003 | -.003 | -.012 ~ .006 | -.001 | -.010 ~ .008 | |
| FEV1, % | | -.051 | -.347 ~ .245 | -.180 | -.528 ~ .167 | -.055 | -.411 ~ .300 | |
| FEV1/FVC, % | | -.025 | -.272 ~ .222 | .173 | -.117 ~ .464 | .140 | -.157 ~ .437 | |
| FEV1, % change | | .051 | -.083 ~ .185 | .116 | -.042 ~ .273 | .142 | -.019 ~ .303 | |
| **ACT** | | -0.082 | -0.132 ~ -0.033 | -0.086 | -0.149 ~ -0.023 | -0.089 | | -0.154 ~ -0.024 |

**Definition of abbreviations:** EOA, early-onset asthma; LOA, late-onset asthma; ACT, asthma control test; IgE, immunoglobulin E; ECP, eosinophil cationic protein; FVC, forced vital capacity; FEV1, forced expiratory volume in 1 s; BD, bronchodilator; PM10 = particles with an aerodynamic diameter of 10 μm or less;

**Table S2. Associations between PM2.5 exposure levels and asthma features among patients with EOA or LOA**

| Early onset (N=260) | | | | | | | | |
| --- | --- | --- | --- | --- | --- | --- | --- | --- |
| Mean level of PM2.5 (μg/m3) | 1-month: 15.16 ± 4.06 | | | 6-month: 16.27 ± 3.35 | | 12-month: 16.88 ± 2.74 | | |
|  | | **β** | **Confidence Interval** | **β** | **Confidence Interval** | **β** | **Confidence Interval** | |
| Age of onset | | -.331 | -.697 ~ .036 | -.684 | -1.144 ~ -.224 | -.665 | -1.227 ~ -.103 | |
| Asthma duration | | .331 | -.036 ~ .697 | .684 | .224 ~ 1.144 | .665 | .103 ~ 1.227 | |
| **Blood tests** | |  |  |  |  |  |  | |
| IgE level, KU/L | | 1.969 | -10.499 ~ 14.437 | -1.557 | -17.376 ~ 14.261 | -12.662 | -31.797 ~ 6.473 | |
| Eosinophils, % | | -.035 | -.121 ~ .051 | -.065 | -.174 ~ .044 | -.069 | -.201 ~ .063 | |
| Eosinophils, count | | -6.868 | -13.973 ~ .238 | -7.658 | -16.686 ~ 1.369 | -12.770 | -23.673 ~ -1.867 | |
| ECP | | -.394 | -1.013 ~ .224 | -.098 | -.885 ~ .689 | -.652 | -1.604 ~ .300 | |
| **Lung function** | |  |  |  |  |  |  | |
| FVC, L | | -.042 | -.080 ~ -.003 | -.018 | -.067 ~ .031 | -.011 | -.071 ~ .048 | |
| FVC, % | | -.955 | -1.857 ~ -.052 | -.460 | -1.614 ~ .693 | -.289 | -1.690 ~ 1.112 | |
| FEV1, L | | -.038 | -.072 ~ -.005 | -.021 | -.064 ~ .022 | -.016 | -.068 ~ .037 | |
| FEV1, % | | -1.091 | -1.980 ~ -.203 | -.514 | -1.652 ~ .623 | -.350 | -1.733 ~ 1.032 | |
| FEV1/FVC, % | | -.919 | -1.718 ~ -.120 | -.241 | -1.264 ~ .783 | -.057 | -1.300 ~ 1.186 | |
| FEV1, % change | | -.312 | -.691 ~ .067 | -.569 | -1.047 ~ -.091 | -.630 | -1.211 ~ -.049 | |
| **ACT** | | 0.005 | -0.128 ~ 0.137 | 0.113 | -0.077 ~ 0.304 | 0.145 | | -0.082 ~ 0.372 |
| Late onset (N=415) | | | | | | | | |
| Mean level of PM2.5 (μg/m3) | 1-month: 15.13 ± 4.15 | | | 6-month: 15.90 ± 3.34 | | 12-month: 16.83 ± 2.90 | | |
|  | | **β** | **Confidence Interval** | **β** | **Confidence Interval** | **β** | **Confidence Interval** | |
| Age of onset | | .057 | -.105 ~ .218 | -.101 | -.303 ~ .101 | -.052 | -.286 ~ .183 | |
| Asthma duration | | -.057 | -.218 ~ .105 | .101 | -.101 ~ .303 | .052 | -.183 ~ .286 | |
| **Blood tests** | |  |  |  |  |  |  | |
| IgE level, KU/L | | -4.033 | -14.748 ~ 6.681 | -3.635 | -17.029 ~ 9.759 | -5.504 | -21.040 ~ 10.031 | |
| Eosinophils, % | | -.020 | -.079 ~ .039 | -.011 | -.084 ~ .062 | -.036 | -.121 ~ .049 | |
| Eosinophils, count | | -2.139 | -6.863 ~ 2.584 | -3.373 | -9.273 ~ 2.527 | -5.024 | -11.863 ~ 1.814 | |
| ECP | | .024 | -.281 ~ .330 | -.183 | -.565 ~ .199 | -.274 | -.716 ~ .169 | |
| **Lung function** | |  |  |  |  |  |  | |
| FVC, L | | -.026 | -.044 ~ -.008 | -.025 | -.048 ~ -.002 | -.023 | -.049 ~ .004 | |
| FVC, % | | -.515 | -1.064 ~ .035 | -.909 | -1.592 ~ -.225 | -.630 | -1.427 ~ .167 | |
| FEV1, L | | -.022 | -.037 ~ -.007 | -.023 | -.042 ~ -.005 | -.023 | -.045 ~ -.001 | |
| FEV1, % | | -.663 | -1.242 ~ -.085 | -1.098 | -1.818 ~ -.379 | -1.020 | -1.858 ~ -.182 | |
| FEV1/FVC, % | | -.505 | -.989 ~ -.021 | -.126 | -.733 ~ .482 | -.403 | -1.107 ~ .301 | |
| FEV1, % change | | -.145 | -.409 ~ .119 | -.073 | -.403 ~ .257 | -.025 | -.408 ~ .358 | |
| **ACT** | | -0.130 | -0.226 ~ -0.034 | -0.155 | -0.284 ~ -0.026 | -0.183 | | -0.341 ~ -0.025 |

**Definition of abbreviations:** EOA, early-onset asthma; LOA, late-onset asthma; ACT, asthma control test; IgE, immunoglobulin E; ECP, eosinophil cationic protein; FVC, forced vital capacity; FEV1, forced expiratory volume in 1 s; BD, bronchodilator; PM2.5 = particles with an aerodynamic diameter of 2.5 μm or less.

**Table S3. Associations between NO2 exposure levels and asthma features among patients with EOA or LOA**

| Early onset (N=260) | | | | | | | | |
| --- | --- | --- | --- | --- | --- | --- | --- | --- |
| Mean level of NO2 (ppb) | 1-month: 15.61 ± 4.77 | | | 6-month: 16.37 ± 4.26 | | 12-month: 16.57 ± 3.88 | | |
|  | | **β** | **Confidence Interval** | **β** | **Confidence Interval** | **β** | **Confidence Interval** | |
| Age of onset | | -.041 | -.353 ~ .271 | -.072 | -.421 ~ .276 | -.047 | -.431 ~ .336 | |
| Asthma duration | | .041 | -.271 ~ .353 | .072 | -.276 ~ .421 | .047 | -.336 ~ .431 | |
| **Blood tests** | |  |  |  |  |  |  | |
| IgE level, KU/L | | .022 | -10.540 ~ 10.584 | 1.370 | -10.435 ~ 13.174 | -1.171 | -14.140 ~11.798 | |
| Eosinophils, % | | .057 | -.016 ~ .129 | .068 | -.013 ~ .149 | .098 | .010 ~.187 | |
| Eosinophils, count | | 5.784 | -.235 ~ 11.802 | 9.624 | 2.955 ~ 16.293 | 11.917 | 4.622 ~19.213 | |
| ECP | | -.404 | -.927 ~ .119 | -.056 | -.643 ~ .532 | -.095 | -.740 ~.550 | |
| **Lung function** | |  |  |  |  |  |  | |
| FVC, L | | -.041 | -.073 ~ -.009 | -.037 | -.074 ~ -.001 | -.035 | -.075 ~.005 | |
| FVC, % | | -.743 | -1.509 ~ .022 | -.752 | -1.609 ~ .104 | -.508 | -1.453 ~.436 | |
| FEV1, L | | -.043 | -.071 ~ -.015 | -.040 | -.072 ~ -.008 | -.039 | -.074 ~ -.004 | |
| FEV1, % | | -.862 | -1.615 ~ -.109 | -.845 | -1.689 ~ -.001 | -.648 | -1.579 ~ .283 | |
| FEV1/FVC, % | | -.863 | -1.539 ~ -.188 | -.653 | -1.413 ~ .107 | -.549 | -1.386 ~ .287 | |
| FEV1, % change | | -.234 | -.556 ~ .087 | -.298 | -.656 ~ .061 | -.346 | -.739 ~ .048 | |
| **ACT** | | -0.113 | -0.228 ~ 0.002 | -0.112 | -0.243 ~0.019 | 0.145 | | -0.082 ~ 0.372 |
| Late onset (N=415) | | | | | | | | |
| Mean level of NO2 (ppb) | 1-month: 14.95 ± 4.54 | | | 6-month: 15.51 ± 4.36 | | 12-month: 16.04 ± 4.09 | | |
|  | | **β** | **Confidence Interval** | **β** | **Confidence Interval** | **β** | **Confidence Interval** | |
| Age of onset | | -.011 | -.159 ~.138 | -.096 | -.251 ~ .059 | -.076 | -.241 ~ .089 | |
| Asthma duration | | .011 | -.138 ~.159 | .096 | -.059 ~ .251 | .076 | -.089 ~ .241 | |
| **Blood tests** | |  |  |  |  |  |  | |
| IgE level, KU/L | | 3.984 | -5.856 ~ 13.825 | 4.487 | -5.798 ~ 14.772 | 5.431 | -5.515 ~ 16.377 | |
| Eosinophils, % | | -.016 | -.070 ~ .038 | -.010 | -.066 ~ .047 | -.023 | -.083 ~ .038 | |
| Eosinophils, count | | -1.317 | -5.659 ~ 3.024 | -1.589 | -6.127 ~ 2.948 | -2.816 | -7.641 ~ 2.010 | |
| ECP | | .008 | -.272 ~.289 | .002 | -.291 ~ .296 | -.060 | -.373 ~ .252 | |
| **Lung function** | |  |  |  |  |  |  | |
| FVC, L | | -.011 | -.028 ~ .005 | -.011 | -.028 ~ .007 | -.005 | -.024 ~ .014 | |
| FVC, % | | -.131 | -0.638 ~ .375 | -.269 | -.798 ~ .260 | .098 | -0.466 ~ .661 | |
| FEV1, L | | -.007 | -.021 ~ .007 | -.006 | -0.021 ~ .008 | -1.599E-05 | -.015 ~ .015 | |
| FEV1, % | | -.045 | -.580 ~ .489 | -.095 | -.653 ~ .464 | .266 | -0.329 ~ .860 | |
| FEV1/FVC, % | | .062 | -.385 ~ .509 | .272 | -.194 ~ .738 | .391 | -.105 ~ .886 | |
| FEV1, % change | | -.001 | -.244 ~ .241 | .083 | -.171 ~ .336 | .057 | -.213 ~ .327 | |
| **ACT** | | -0.026 | -0.115 ~ 0.063 | -0.009 | -0.102 ~ 0.084 | 0.029 | | -0.071 ~ 0.129 |

**Definition of abbreviations:** EOA, early-onset asthma; LOA, late-onset asthma; ACT, asthma control test; IgE, immunoglobulin E; ECP, eosinophil cationic protein; FVC, forced vital capacity; FEV1, forced expiratory volume in 1 s; BD, bronchodilator; NO2 = nitrogen dioxide.

**Table S4. Associations between O3 exposure levels and asthma features among patients with EOA or LOA**

| Early onset (N=260) | | | | | | | | |
| --- | --- | --- | --- | --- | --- | --- | --- | --- |
| Mean level of O3 (ppb) | 1-month: 28.93 ± 7.32 | | | 6-month: 28.96 ± 3.26 | | 12-month: 29.15 ± 2.85 | | |
|  | | **β** | **Confidence Interval** | **β** | **Confidence Interval** | **β** | **Confidence Interval** | |
| Age of onset | | .140 | -.065 ~ .344 | .003 | -.457 ~ .464 | .191 | -.334 ~ .716 | |
| Asthma duration | | -.140 | -.344 ~ .065 | -.003 | -.464 ~ .457 | -.191 | -.716 ~ .334 | |
| **Blood tests** | |  |  |  |  |  |  | |
| IgE level, KU/L | | -.046 | -6.978 ~ 6.887 | -7.559 | -23.094 ~ 7.975 | -11.349 | -29.072 ~ 6.373 | |
| Eosinophils, % | | .007 | -.041 ~ .055 | -.070 | -.177 ~ .037 | -.084 | -.207 ~ .038 | |
| Eosinophils, count | | -.837 | -4.813 ~ 3.140 | -6.140 | -15.037 ~ 2.757 | -7.590 | -17.747 ~ 2.568 | |
| ECP | | -.259 | -.603 ~ .084 | -.538 | -1.309 ~ .233 | -.735 | -1.614 ~ .145 | |
| **Lung function** | |  |  |  |  |  |  | |
| FVC, L | | .000 | -.021 ~ .022 | -.013 | -.062 ~ .035 | .027 | -.028 ~ .082 | |
| FVC, % | | -.266 | -.771 ~ .239 | -.843 | -1.974 ~ .288 | .042 | -1.256 ~ 1.340 | |
| FEV1, L | | .002 | -.017 ~ .021 | -.005 | -.048 ~ .037 | .033 | -.015 ~ .082 | |
| FEV1, % | | -.280 | -.778 ~ .218 | -.569 | -1.688 ~ .550 | .377 | -.903 ~ 1.657 | |
| FEV1/FVC, % | | -.365 | -.812 ~ .081 | -.316 | -1.322 ~ .691 | .429 | -.721 ~ 1.578 | |
| FEV1, % change | | -.016 | -.228 ~ .196 | .187 | -.287 ~ .662 | .289 | -.253 ~ .830 | |
| **ACT** | | -0.002 | -0.078 ~ 0.075 | 0.071 | -0.105 ~ 0.247 | 0.172 | | -0.033 ~ 0.378 |
| Late onset (N=415) | | | | | | | | |
| Mean level of O3 (ppb) | 1-month: 29.98 ± 7.50 | | | 6-month: 28.89 ± 3.77 | | 12-month: 29.42 ± 3.31 | | |
|  | | **β** | **Confidence Interval** | **β** | **Confidence Interval** | **β** | **Confidence Interval** | |
| Age of onset | | .013 | -.077 ~ .103 | -.111 | -.288 ~ .067 | -.120 | -.322 ~ .082 | |
| Asthma duration | | -.013 | -.103 ~ .077 | .111 | -.067 ~ .288 | .120 | -.082 ~ .322 | |
| **Blood tests** | |  |  |  |  |  |  | |
| IgE level, KU/L | | -2.064 | -8.029 ~ 3.902 | -5.703 | -17.482 ~ 6.077 | -5.992 | -19.409 ~ 7.426 | |
| Eosinophils, % | | -.005 | -.038 ~ .027 | .038 | -.027 ~ .103 | .034 | -.039 ~ .108 | |
| Eosinophils, count | | .408 | -2.224 ~ 3.040 | 1.994 | -3.203 ~ 7.191 | 1.919 | -4.001 ~ 7.839 | |
| ECP | | .073 | -.097 ~ .243 | .247 | -.089 ~ .582 | .155 | -.227 ~ .538 | |
| **Lung function** | |  |  |  |  |  |  | |
| FVC, L | | -.007 | -.018 ~ .003 | -.022 | -.042 ~ -.002 | -.012 | -.035 ~ .011 | |
| FVC, % | | .063 | -.244 ~ .370 | -.648 | -1.251 ~ -.045 | -.173 | -.864 ~ .517 | |
| FEV1, L | | -.005 | -.014 ~ .003 | -.023 | -.039 ~ -.007 | -.015 | -.033 ~ .004 | |
| FEV1, % | | .032 | -.292 ~ .355 | -.830 | -1.465 ~ -.195 | -.389 | -1.117 ~ .339 | |
| FEV1/FVC, % | | -.211 | -.481 ~ .059 | -.762 | -1.292 ~ -.232 | -.623 | -1.229 ~ -.017 | |
| FEV1, % change | | -.090 | -.237 ~ .057 | -.058 | -.349 ~ .232 | -.081 | -.412 ~ .250 | |
| **ACT** | | -0.040 | -0.094 ~ 0.013 | -0.103 | -0.207 ~ 0.001 | -0.063 | | -0.182 ~0.056 |

**Definition of abbreviations:** EOA, early-onset asthma; LOA, late-onset asthma; ACT, asthma control test; IgE, immunoglobulin E; ECP, eosinophil cationic protein; FVC, forced vital capacity; FEV1, forced expiratory volume in 1 s; BD, bronchodilator; O3 = ozone

**Table S5. Associations between PM10 and asthma features among patients with EOA of LOA as a function of atopy status**

| Early onset, atopy (N=157) | | | | | | | | |
| --- | --- | --- | --- | --- | --- | --- | --- | --- |
| Mean level of PM10 (μg/m3) | 1-month: 27.59 ± 7.95 | | | 6-month: 29.08 ± 7.40 | | 12-month: 30.43 ± 6.99 | | |
|  | | **β** | **Confidence Interval** | **β** | **Confidence Interval** | **β** | **Confidence Interval** | |
| Age of onset | | -.187 | -.425 ~ .052 | -.295 | -.552 ~ -.037 | -.272 | -.543 ~ .000 | |
| Asthma duration | | .187 | -.052 ~ .425 | .295 | .037 ~ .552 | .272 | .000 ~ 0.543 | |
| **Blood tests** | |  |  |  |  |  |  | |
| IgE level, KU/L | | 0.762 | -8.737 ~ 10.261 | -1.456 | -11.786 ~ 8.873 | -4.443 | -15.285 ~ 6.399 | |
| Eosinophils, % | | -.004 | -.069 ~ .061 | -.026 | -.096 ~ .045 | -.027 | -.101 ~ .047 | |
| Eosinophils, count | | -3.253 | -8.516 ~ 2.010 | -3.198 | -8.927 ~ 2.531 | -5.031 | -11.026 ~ 0.963 | |
| ECP | | .015 | -.399 ~ .429 | -.002 | -.453 ~ .448 | -.034 | -.508 ~ .440 | |
| **Lung function** | |  |  |  |  |  |  | |
| FVC, L | | -.012 | -.039 ~ .016 | -.017 | -.047 ~ .014 | -.010 | -.042 ~ .022 | |
| FVC, % | | -.460 | -1.066 ~ .147 | -.437 | -1.098 ~ .224 | -.212 | -.910 ~ .486 | |
| FEV1, L | | -.014 | -.039 ~ .012 | -.022 | -.050 ~ .005 | -.018 | -.047 ~ .011 | |
| FEV1, % | | -.641 | -1.235 ~ -.046 | -.693 | -1.339 ~ -.046 | -.517 | -1.203 ~ .168 | |
| FEV1/FVC, % | | -.439 | -.969 ~ .092 | -.455 | -1.032 ~ .123 | -.398 | -1.007 ~ .211 | |
| FEV1, % change | | -.043 | -.260 ~ .173 | -.092 | -0.327 ~ .142 | -.019 | -.266 ~ .229 | |
| **ACT** | | -0.063 | -0.165 ~ 0.039 | 0.000 | -0.115 ~ 0.116 | -0.014 | | -0.136 ~ 0.108 |
| Late onset, atopy (N=159) | | | | | | | | |
| Mean level of PM10 (μg/m3) | 1-month: 26.55 ± 7.88 | | | 6-month: 27.86 ± 7.04 | | 12-month: 29.65 ± 6.85 | | |
|  | | **β** | **Confidence Interval** | **β** | **Confidence Interval** | **β** | **Confidence Interval** | |
| Age of onset | | .163 | .022 ~ .303 | .106 | -.053 ~ .265 | .182 | .019 ~ .344 | |
| Asthma duration | | -.163 | -.303 ~ -.022 | -.106 | -.265 ~ .053 | -.182 | -.344 ~ -.019 | |
| **Blood tests** | |  |  |  |  |  |  | |
| IgE level, KU/L | | -.672 | -13.958 ~ 12.615 | -.128 | -15.012 ~ 14.757 | -1.562 | -16.923 ~ 13.800 | |
| Eosinophils, % | | -.036 | -.088 ~ .016 | -.045 | -.103 ~ .013 | -.045 | -.105 ~ .015 | |
| Eosinophils, count | | -3.716 | -7.749 ~ 0.317 | -5.521 | -10.001 ~ -1.040 | -5.431 | -10.064 ~ -.798 | |
| ECP | | -.142 | -.342 ~ .057 | -.152 | -.376 ~ .071 | -.195 | -.425 ~ .035 | |
| **Lung function** | |  |  |  |  |  |  | |
| FVC, L | | -.004 | -.022 ~ .014 | -.001 | -.021 ~ .019 | .003 | -.017 ~ .024 | |
| FVC, % | | .010 | -0.471 ~ .492 | -.056 | -0.595 ~ .483 | .089 | -0.468 ~ .645 | |
| FEV1, L | | -.003 | -.017 ~ .012 | .002 | -.014 ~ .018 | .005 | -.012 ~ .021 | |
| FEV1, % | | -.003 | -.508 ~ .502 | .046 | -.519 ~ .612 | .124 | -.459 ~ .708 | |
| FEV1/FVC, % | | .326 | -.050 ~.703 | .531 | .114 ~ .948 | .588 | .159 ~ 1.017 | |
| FEV1, % change | | .176 | -.031 ~ .382 | .325 | .097 ~ 0.552 | .323 | .088 ~ .558 | |
| **ACT** | | -0.011 | -0.095 ~ 0.074 | 0.000 | -0.106 ~ 0.107 | 0.035 | | -0.071 ~ 0.141 |
| Early onset, non-atopy (N=103) | | | | | | | | |
| Mean level of PM10 (μg/m3) | 1-month**:** 27.63 ± 6.70 | | | 6-month: 29.83 ± 6.45 | | 12-month: 30.93 ± 5.63 | | |
|  | | **β** | **Confidence Interval** | **β** | **Confidence Interval** | **β** | **Confidence Interval** | |
| Age of onset | | -.141 | -.520 ~ .238 | -.380 | -.786 ~ .026 | -.269 | -.730 ~ .191 | |
| Asthma duration | | .141 | -.238 ~ .520 | .380 | -.026 ~ .786 | .269 | -.191 ~ .730 | |
| **Blood tests** | |  |  |  |  |  |  | |
| IgE level, KU/L | | -2.663 | -8.667 ~ 3.340 | -5.421 | -11.876 ~ 1.035 | -9.426 | -16.528 ~ -2.324 | |
| Eosinophils, % | | .001 | -.064 ~ .066 | .000 | -.071 ~ .071 | -.012 | -.091 ~ .068 | |
| Eosinophils, count | | -.189 | -5.827 ~ 5.449 | .034 | -6.090 ~ 6.157 | -.991 | -7.862 ~ 5.881 | |
| ECP | | -.081 | -.664 ~ .502 | .664 | .044 ~ 1.283 | .368 | -.340 ~ 1.075 | |
| **Lung function** | |  |  |  |  |  |  | |
| FVC, L | | -.026 | -.059 ~ .007 | -.014 | -.050 ~ .022 | -.017 | -.057 ~ .024 | |
| FVC, % | | -.420 | -1.323 ~ .483 | -.138 | -1.122 ~ .847 | -.099 | -1.205 ~ 1.006 | |
| FEV1, L | | -.026 | -.052 ~ .001 | -.015 | -.044 ~ .015 | -.016 | -.049 ~ .017 | |
| FEV1, % | | -.583 | -1.462 ~ .296 | -.242 | -1.204 ~ .720 | -.203 | -1.284 ~ .877 | |
| FEV1/FVC, % | | -.841 | -1.637 ~ -.045 | -.433 | -1.312 ~ .446 | -.365 | -1.354 ~ .624 | |
| FEV1, % change | | -.091 | -.536 ~ .354 | -.129 | -0.612 ~ .354 | -.193 | -.735 ~ .349 | |
| **ACT** | | 0.010 | -0.104 ~ 0.125 | 0.009 | -0.130 ~ 0.149 | 0.026 | | -0.123 ~ 0.175 |
| Late onset, non-atopy (N=256) | | | | | | | | |
| Mean level of PM10 (μg/m3) | 1-month:28.15 ± 8.29 | | | 6-month: 28.81 ± 6.90 | | 12-month: 30.52 ± 6.80 | | |
|  | | **β** | **Confidence Interval** | **β** | **Confidence Interval** | **β** | **Confidence Interval** | |
| Age of onset | | .047 | -.051 ~ .146 | .019 | -.100 ~ .138 | .030 | -.091 ~ .151 | |
| Asthma duration | | -.047 | -.146 ~ .051 | -.019 | -.138 ~ .100 | -.030 | -.151 ~ .091 | |
| **Blood tests** | |  |  |  |  |  |  | |
| IgE level, KU/L | | 0.914 | -1.126 ~ 2.954 | .051 | -2.418 ~ 2.520 | -.207 | -2.710 ~ 2.297 | |
| Eosinophils, % | | -.020 | -.057 ~ .017 | -.019 | -.063 ~ .025 | -.029 | -.074 ~ .016 | |
| Eosinophils, count | | -1.470 | -4.458 ~ 1.518 | -2.430 | -6.035 ~ 1.176 | -3.144 | -6.793 ~ 0.504 | |
| ECP | | -.012 | -.232 ~ .207 | -.094 | -.359 ~ .171 | -.087 | -.355 ~ .182 | |
| **Lung function** | |  |  |  |  |  |  | |
| FVC, L | | -.007 | -.018 ~ .003 | -.009 | -.022 ~ .004 | -.007 | -.020 ~ .005 | |
| FVC, % | | -.073 | -.419 ~ .272 | -.338 | -.754 ~ .078 | -.181 | -.604 ~.242 | |
| FEV1, L | | -.004 | -.013 ~ .005 | -.006 | -.017 ~ .005 | -.003 | -.014 ~ .007 | |
| FEV1, % | | -.057 | -0.427 ~ .312 | -.305 | -.750 ~ .140 | -.150 | -.602 ~ .303 | |
| FEV1/FVC, % | | -.213 | -.539 ~ .113 | -.047 | -.442 ~ .348 | -.126 | -.527 ~ .274 | |
| FEV1, % change | | -.024 | -.201 ~ .154 | -.025 | -.240 ~ .189 | .023 | -.195 ~ .240 | |
| **ACT** | | -0.130 | -0.192 ~ -0.068 | -0.141 | -0.220 ~ -0.062 | -0.174 | | -0.255 ~ -0.092 |

**Definition of abbreviations:** EOA, early-onset asthma; LOA, late-onset asthma; ACT, asthma control test; IgE, immunoglobulin E; ECP, eosinophil cationic protein; FVC, forced vital capacity; FEV1, forced expiratory volume in 1 s; BD, bronchodilator; PM10 = particles with an aerodynamic diameter of 10 μm or less.

**Table S6. Associations between PM2.5 exposure levels and asthma features among patients with EOA or LOA as a function of atopy status**

| Early onset, atopy (N=157) | | | | | | | | |
| --- | --- | --- | --- | --- | --- | --- | --- | --- |
| Mean level of PM2.5 (μg/m3) | 1-month:14.97 ± 4.09 | | | 6-month: 16.03 ± 3.32 | | 12-month: 16.66 ± 2.77 | | |
|  | | **β** | **Confidence Interval** | **β** | **Confidence Interval** | **β** | **Confidence Interval** | |
| Age of onset | | -.519 | -.978 ~ -.060 | -.910 | -1.475 ~ -.344 | -1.031 | -1.711 ~ -.352 | |
| Asthma duration | | .519 | .060 ~ .978 | .910 | .344 ~ 1.475 | 1.031 | .352 ~ 1.711 | |
| **Blood tests** | |  |  |  |  |  |  | |
| IgE level, KU/L | | 4.855 | -13.550 ~ 23.259 | .470 | -22.605 ~ 23.545 | -10.648 | -38.223 ~ 16.926 | |
| Eosinophils, % | | -.043 | -.168 ~ .083 | -.078 | -.235 ~ .079 | -.057 | -.245 ~ .131 | |
| Eosinophils, count | | -10.164 | -20.289 ~ -.040 | -9.878 | -22.625 ~ 2.870 | -14.992 | -30.183 ~ .199 | |
| ECP | | -.276 | -1.078 ~ .526 | -.691 | -1.691 ~ .309 | -1.021 | -2.214 ~ .172 | |
| **Lung function** | |  |  |  |  |  |  | |
| FVC, L | | -.050 | -.103 ~ .004 | -.040 | -.107 ~ .028 | -.027 | -.108 ~ .054 | |
| FVC, % | | -1.250 | -2.418 ~ -.082 | -1.101 | -2.575 ~ .372 | -.785 | -2.557 ~ .988 | |
| FEV1, L | | -.044 | -.092 ~ .005 | -.041 | -.102 ~ .021 | -.033 | -.107 ~ .041 | |
| FEV1, % | | -1.336 | -2.487 ~ -.186 | -1.183 | -2.637 ~ .270 | -.960 | -2.708 ~ .789 | |
| FEV1/FVC, % | | -.914 | -1.942 ~ .113 | -.632 | -1.928 ~ .664 | -.741 | -2.293 ~ .811 | |
| FEV1, % change | | -.348 | -.764 ~ .067 | -.615 | -1.131 ~ -.099 | -.470 | -1.095 ~ .154 | |
| **ACT** | | -0.014 | -0.200 ~ 0.173 | 0.125 | -0.138 ~ 0.388 | 0.104 | | -0.208 ~ 0.416 |
| Late onset, atopy (N=159) | | | | | | | | |
| Mean level of PM2.5 (μg/m3) | 1-month:14.56 ± 3.89 | | | 6-month: 15.52 ± 3.09 | | 12-month: 16.50 ± 2.70 | | |
|  | | **β** | **Confidence Interval** | **β** | **Confidence Interval** | **β** | **Confidence Interval** | |
| Age of onset | | .138 | -.156 ~ .431 | -.092 | -.461 ~ .278 | .101 | -.331 ~ .534 | |
| Asthma duration | | -.138 | -.431 ~ .156 | .092 | -.278 ~ .461 | -.101 | -.534 ~ .331 | |
| **Blood tests** | |  |  |  |  |  |  | |
| IgE level, KU/L | | -3.659 | -31.073 ~ 23.755 | .211 | -34.232 ~ 34.653 | -4.727 | -44.996 ~ 35.541 | |
| Eosinophils, % | | .004 | -.103 ~ .112 | .040 | -.095 ~ .175 | .034 | -.124 ~ .193 | |
| Eosinophils, count | | -3.359 | -11.754 ~ 5.035 | -2.403 | -12.962 ~ 8.156 | -2.563 | -14.912 ~ 9.785 | |
| ECP | | -.066 | -.480 ~ .348 | -.053 | -.573 ~ .467 | -.180 | -.787 ~ .428 | |
| **Lung function** | |  |  |  |  |  |  | |
| FVC, L | | -.027 | -.064 ~ .010 | -.018 | -.065 ~ .028 | -.003 | -.057 ~ .051 | |
| FVC, % | | -.474 | -1.464 ~ .517 | -.628 | -1.872 ~ .616 | -.064 | -1.523 ~ 1.396 | |
| FEV1, L | | -.029 | -.058 ~ .000 | -.023 | -.059 ~ .014 | -.019 | -.062 ~ .024 | |
| FEV1, % | | -.847 | -1.880 ~ .186 | -.978 | -2.278 ~ .321 | -.953 | -2.476 ~ .569 | |
| FEV1/FVC, % | | .077 | -.706 ~ .861 | .504 | -.478 ~ 1.485 | .427 | -.723 ~ 1.576 | |
| FEV1, % change | | .149 | -.280 ~ .578 | .524 | -.009 ~ 1.057 | .670 | .048 ~ 1.292 | |
| **ACT** | | -0.130 | -0.299 ~ 0.038 | -0.138 | -0.371 ~ 0.095 | -0.010 | | -0.301 ~ 0.281 |
| Early onset, non-atopy (N=103) | | | | | | | | |
| Mean level of PM2.5 (μg/m3) | 1-month:15.45 ± 4.01 | | | 6-month: 16.64 ± 3.37 | | 12-month: 17.23 ± 2.67 | | |
|  | | **β** | **Confidence Interval** | **β** | **Confidence Interval** | **β** | **Confidence Interval** | |
| Age of onset | | -.098 | -.734 ~ .539 | -.341 | -1.143 ~ .462 | -.083 | -1.089 ~ .923 | |
| Asthma duration | | .098 | -.539 ~ .734 | .341 | -.462 ~ 1.143 | .083 | -.923 ~ 1.089 | |
| **Blood tests** | |  |  |  |  |  |  | |
| IgE level, KU/L | | -.301 | -10.392 ~ 9.790 | -3.290 | -16.034 ~ 9.455 | -11.898 | -27.666 ~ 3.870 | |
| Eosinophils, % | | -.017 | -.126 ~ .092 | -.043 | -.181 ~ .095 | -.081 | -.252 ~ .091 | |
| Eosinophils, count | | -2.703 | -12.127 ~ 6.721 | -4.577 | -16.479 ~ 7.325 | -9.335 | -24.134 ~ 5.464 | |
| ECP | | -.493 | -1.465 ~ .479 | .869 | -.354 ~ 2.092 | .087 | -1.457 ~ 1.630 | |
| **Lung function** | |  |  |  |  |  |  | |
| FVC, L | | -.030 | -.085 ~ .026 | .020 | -.051 ~ .090 | .021 | -.067 ~ .109 | |
| FVC, % | | -.485 | -2.000 ~ 1.030 | .527 | -1.390 ~ 2.444 | .549 | -1.847 ~ 2.946 | |
| FEV1, L | | -.027 | -.072 ~ .018 | .013 | -.045 ~ .070 | .019 | -.053 ~ .090 | |
| FEV1, % | | -.615 | -2.095 ~ .864 | .540 | -1.335 ~ 2.414 | .727 | -1.615 ~ 3.068 | |
| FEV1/FVC, % | | -.865 | -2.215 ~ .486 | .371 | -1.350 ~ 2.091 | 1.150 | -.989 ~ 3.290 | |
| FEV1, % change | | -.188 | -.934 ~ .557 | -.442 | -1.381 ~ .498 | -.799 | -1.967 ~ .369 | |
| **ACT** | | -0.012 | -0.198 ~ 0.173 | 0.061 | -0.208 ~ 0.329 | 0.145 | | -0.185 ~ 0.475 |
| Late onset, non-atopy (N=256) | | | | | | | | |
| Mean level of PM2.5 (μg/m3) | 1-month:15.49 ± 4.28 | | | 6-month: 16.14 ± 3.47 | | 12-month: 17.03 ± 3.00 | | |
|  | | **β** | **Confidence Interval** | **β** | **Confidence Interval** | **β** | **Confidence Interval** | |
| Age of onset | | -.005 | -.196 ~ .185 | -.127 | -.363 ~ .108 | -.140 | -.413 ~ .133 | |
| Asthma duration | | .005 | -.185 ~ .196 | .127 | -.108 ~ .363 | .140 | -.133 ~ .413 | |
| **Blood tests** | |  |  |  |  |  |  | |
| IgE level, KU/L | | 2.520 | -1.415 ~ 6.456 | .552 | -4.343 ~ 5.448 | .449 | -5.223 ~ 6.121 | |
| Eosinophils, % | | -.029 | -.101 ~ .042 | -.030 | -.118 ~ .058 | -.066 | -.168 ~ .036 | |
| Eosinophils, count | | -1.012 | -6.796 ~ 4.772 | -3.147 | -10.311 ~ 4.017 | -5.621 | -13.904 ~ 2.662 | |
| ECP | | .034 | -.391 ~ .458 | -.284 | -.808 ~ .241 | -.378 | -.985 ~ .230 | |
| **Lung function** | |  |  |  |  |  |  | |
| FVC, L | | -.023 | -.043 ~ -.003 | -.025 | -.050 ~ .000 | -.030 | -.059 ~ -.001 | |
| FVC, % | | -.545 | -1.209 ~ .120 | -1.039 | -1.857 ~ -.221 | -.944 | -1.897 ~ .008 | |
| FEV1, L | | -.018 | -.035 ~ -.001 | -.022 | -.043 ~ -.001 | -.023 | -.048 ~ .001 | |
| FEV1, % | | -.609 | -1.318 ~ .101 | -1.162 | -2.035 ~ -.289 | -1.089 | -2.106 ~ -.073 | |
| FEV1/FVC, % | | -.808 | -1.431 ~ -.184 | -.404 | -1.186 ~ .377 | -.768 | -1.671 ~ .134 | |
| FEV1, % change | | -.308 | -.649 ~ .033 | -.377 | -.800 ~ .046 | -.378 | -.869 ~ .112 | |
| **ACT** | | -0.142 | -0.262 ~ -0.023 | -0.174 | -0.331 ~ -0.016 | -0.277 | | -0.468 ~ -0.086 |

**Definition of abbreviations:** EOA, early-onset asthma; LOA, late-onset asthma; ACT, asthma control test; IgE, immunoglobulin E; ECP, eosinophil cationic protein; FVC, forced vital capacity; FEV1, forced expiratory volume in 1 s; BD, bronchodilator; PM2.5 = particles with an aerodynamic diameter of 2.5 μm or less.

**Table S7. Associations between NO2 exposure levels and asthma features among patients with EOA or LOA as a function of atopy status**

| Early onset, atopy (N=157) | | | | | | | | |
| --- | --- | --- | --- | --- | --- | --- | --- | --- |
| Mean level of NO2 (ppb) | 1-month: 15.18 ± 4.92 | | | 6-month: 15.93 ± 4.42 | | 12-month: 16.12 ± 3.94 | | |
|  | | **β** | **Confidence Interval** | **β** | **Confidence Interval** | **β** | **Confidence Interval** | |
| Age of onset | | .041 | -.346 ~.428 | .000 | -.426 ~ .426 | .052 | -.427 ~ .531 | |
| Asthma duration | | -.041 | -.428 ~ .346 | .000 | -.426 ~ .426 | -.052 | -.531 ~ 0.427 | |
| **Blood tests** | |  |  |  |  |  |  | |
| IgE level, KU/L | | 6.019 | -9.242 ~ 21.281 | 8.349 | -8.436 ~ 25.134 | 7.150 | -11.744 ~ 26.043 | |
| Eosinophils, % | | .076 | -.027 ~ .180 | .079 | -.036 ~ .193 | .130 | .002 ~ .257 | |
| Eosinophils, count | | 7.380 | -1.050 ~ 15.810 | 11.458 | 2.266 ~ 20.650 | 15.224 | 4.973 ~ 25.474 | |
| ECP | | -.230 | -.896 ~ .436 | -.001 | -.736 ~ .733 | .058 | -.767 ~ .883 | |
| **Lung function** | |  |  |  |  |  |  | |
| FVC, L | | -.056 | -.100 ~ -.012 | -.055 | -.104 ~ -.007 | -.052 | -.106 ~ .003 | |
| FVC, % | | -1.337 | -2.297 ~ -.377 | -1.472 | -2.529 ~ -.415 | -1.284 | -2.483 ~ -.084 | |
| FEV1, L | | -.058 | -.098 ~ -.018 | -.056 | -.100 ~ -.012 | -.056 | -.106 ~ -.007 | |
| FEV1, % | | -1.431 | -2.375 ~ -.487 | -1.537 | -2.578 ~ -.496 | -1.445 | -2.625 ~ -.265 | |
| FEV1/FVC, % | | -1.032 | -1.877 ~ -.186 | -.795 | -1.735 ~ .144 | -.808 | -1.866 ~ .250 | |
| FEV1, % change | | -.315 | -.660 ~ .029 | -.388 | -.766 ~ -.010 | -.332 | -.760 ~ .095 | |
| **ACT** | | -0.153 | -0.308 ~ 0.002 | -0.136 | -0.310 ~ 0.037 | -0.176 | | -0.376 ~ 0.023 |
| Late onset, atopy (N=159) | | | | | | | | |
| Mean level of NO2 (ppb) | 1-month: 15.50 ± 4.89 | | | 6-month: 16.09 ± 4.71 | | 12-month: 16.59 ± 4.28 | | |
|  | | **β** | **Confidence Interval** | **β** | **Confidence Interval** | **β** | **Confidence Interval** | |
| Age of onset | | -.050 | -.282 ~ .182 | -.178 | -.420~.063 | -.137 | -.403~.130 | |
| Asthma duration | | .050 | -.182 ~ .282 | .178 | -.063~.420 | .137 | -.130~.403 | |
| **Blood tests** | |  |  |  |  |  |  | |
| IgE level, KU/L | | 3.294 | -18.303 ~ 24.892 | 3.630 | -18.977~26.237 | 6.015 | -18.833~30.862 | |
| Eosinophils, % | | .027 | -.058 ~ .112 | .024 | -.065~.113 | .023 | -.075~.120 | |
| Eosinophils, count | | 2.637 | -3.977 ~ 9.251 | 1.311 | -5.623~8.245 | 1.488 | -6.137~9.112 | |
| ECP | | .061 | -.265 ~ .387 | .034 | -.308~.375 | -.030 | -.406~.345 | |
| **Lung function** | |  |  |  |  |  |  | |
| FVC, L | | -.019 | -.048 ~ .010 | -.023 | -.053~.008 | -.018 | -.051~.015 | |
| FVC, % | | -.201 | -.983 ~ .581 | -.343 | -1.160~.475 | -.043 | -0.944~.858 | |
| FEV1, L | | -.014 | -.037 ~ .009 | -.016 | -.040~.008 | -.012 | -.039~.015 | |
| FEV1, % | | -.199 | -1.019 ~ .621 | -.209 | -1.067~.650 | .033 | -0.912~.977 | |
| FEV1/FVC, % | | .316 | -.300 ~ .931 | .450 | -.193~1.092 | .548 | -.157~1.254 | |
| FEV1, % change | | .281 | -.054 ~ .616 | .389 | .040~.738 | .411 | .027~.795 | |
| **ACT** | | -0.074 | -0.205 ~ 0.058 | -0.063 | -0.201~0.076 | -0.012 | | -0.166~0.141 |
| Early onset, non-atopy (N=103) | | | | | | | | |
| Mean level of NO2 (ppb) | 1-month: 16.27 ± 4.48 | | | 6-month: 17.05 ± 3.92 | | 12-month: 17.25 ± 3.70 | | |
|  | | **β** | **Confidence Interval** | **β** | **Confidence Interval** | **β** | **Confidence Interval** | |
| Age of onset | | -.268 | -.840 ~ .303 | -.297 | -.952 ~ .357 | -.310 | -1.009 ~ .388 | |
| Asthma duration | | .268 | -.303 ~ .840 | .297 | -.357 ~ .952 | .310 | -.388 ~ 1.009 | |
| **Blood tests** | |  |  |  |  |  |  | |
| IgE level, KU/L | | -1.191 | -10.287 ~ 7.905 | -1.520 | -11.935 ~ 8.894 | -4.521 | -15.608 ~ 6.566 | |
| Eosinophils, % | | .050 | -.048 ~ .148 | .079 | -.033 ~ .190 | .080 | -.039 ~ .200 | |
| Eosinophils, count | | 3.848 | -4.628 ~ 12.325 | 7.286 | -2.350 ~ 16.922 | 7.627 | -2.666 ~ 17.919 | |
| ECP | | -.411 | -1.288 ~ .466 | .248 | -.759 ~ 1.255 | .079 | -.998 ~ 1.156 | |
| **Lung function** | |  |  |  |  |  |  | |
| FVC, L | | -.008 | -.058 ~.042 | .005 | -.053 ~ .062 | .002 | -.060 ~ .063 | |
| FVC, % | | .347 | -1.020 ~ 1.714 | .696 | -.865 ~ 2.258 | .938 | -.725 ~ 2.601 | |
| FEV1, L | | -.009 | -.050 ~ .032 | .001 | -.046 ~ .048 | .002 | -.048 ~ .052 | |
| FEV1, % | | .190 | -1.148 ~ 1.528 | .556 | -.973 ~ 2.085 | .845 | -.783 ~ 2.473 | |
| FEV1/FVC, % | | -.628 | -1.850 ~ .593 | -.421 | -1.824 ~ .983 | -.129 | -1.629 ~ 1.372 | |
| FEV1, % change | | -.051 | -.724 ~ .622 | -.110 | -.880 ~ .660 | -.381 | -1.200 ~ .438 | |
| **ACT** | | -0.128 | -0.303 ~ 0.046 | -0.149 | -0.353 ~ 0.054 | -0.140 | | -0.362 ~ 0.081 |
| Late onset, non-atopy (N=256) | | | | | | | | |
| Mean level of NO2 (ppb) | 1-month: 14.61 ± 4.27 | | | 6-month: 15.15 ± 4.10 | | 12-month: 15.69 ± 3.93 | | |
|  | | **β** | **Confidence Interval** | **β** | **Confidence Interval** | **β** | **Confidence Interval** | |
| Age of onset | | .070 | -.122 ~ .262 | .024 | -.177~.225 | -.180~.238 | -.180~.238 | |
| Asthma duration | | -.070 | -.262 ~ .122 | -.024 | -.225~.177 | -.238~.180 | -.238~.180 | |
| **Blood tests** | |  |  |  |  |  |  | |
| IgE level, KU/L | | -0.835 | -4.812 ~ 3.142 | -.913 | -5.078~3.251 | -5.741~2.920 | -5.741~2.920 | |
| Eosinophils, % | | -.056 | -.127 ~ .015 | -.043 | -.118~.032 | -.140~.015 | -.140~.015 | |
| Eosinophils, count | | -4.671 | -10.473 ~ 1.130 | -4.146 | -10.229~1.937 | -12.559~.048 | -12.559~.048 | |
| ECP | | -.031 | -.459 ~ .396 | -.020 | -.467~.428 | -.556~.375 | -.556~.375 | |
| **Lung function** | |  |  |  |  |  |  | |
| FVC, L | | -.009 | -.030 ~ .011 | -.006 | -.027~.015 | -.023~.022 | -.023~.022 | |
| FVC, % | | -.110 | -.783 ~ .563 | -.253 | -.958~.451 | -0.602~.864 | -0.602~.864 | |
| FEV1, L | | -.004 | -.021 ~ .013 | -.002 | -.020~.016 | -.014~.024 | -.014~.024 | |
| FEV1, % | | .047 | -.673 ~ .766 | -0.043 | -0.796~.710 | -.399~1.165 | -.399~1.165 | |
| FEV1/FVC, % | | -.167 | -.803 ~ .469 | .103 | -.564~.769 | -.436~.949 | -.436~.949 | |
| FEV1, % change | | -.201 | -.546 ~ .144 | -.129 | -.491~.233 | -.542~.210 | -.542~.210 | |
| **ACT** | | 0.022 | -0.102 ~ 0.145 | 0.045 | -0.084~0.174 | 0.069 | | -0.066~0.205 |

**Definition of abbreviations:** EOA, early-onset asthma; LOA, late-onset asthma; ACT, asthma control test; IgE, immunoglobulin E; ECP, eosinophil cationic protein; FVC, forced vital capacity; FEV1, forced expiratory volume in 1 s; BD, bronchodilator; NO2 = nitrogen dioxide.

**Table S8. Associations between O3 exposure levels and asthma features among patients with EOA or LOA as a function of atopy status**

| Early onset, atopy (N=157) | | | | | | | | |
| --- | --- | --- | --- | --- | --- | --- | --- | --- |
| Mean level of O3 (ppb) | 1-month: 28.95 ± 7.35 | | | 6-month: 28.80 ± 3.23 | | 12-month: 29.05 ± 2.83 | | |
|  | | **β** | **Confidence Interval** | **β** | **Confidence Interval** | **β** | **Confidence Interval** | |
| Age of onset | | .108 | -.148 ~ .364 | -.092 | -.676 ~ .493 | .114 | -.555 ~ .783 | |
| Asthma duration | | -.108 | -.364 ~ .148 | .092 | -.493 ~ .676 | -.114 | -.783 ~ 0.555 | |
| **Blood tests** | |  |  |  |  |  |  | |
| IgE level, KU/L | | -.600 | -10.737 ~ 9.538 | -8.024 | -31.093 ~ 15.044 | -14.330 | -40.677 ~ 12.017 | |
| Eosinophils, % | | -.008 | -.078 ~ .061 | -.127 | -.283 ~ .029 | -.142 | -.322 ~ .037 | |
| Eosinophils, count | | -2.866 | -8.491 ~ 2.758 | -11.124 | -23.861 ~ 1.614 | -12.806 | -27.385 ~ 1.773 | |
| ECP | | -.078 | -.520 ~ .364 | -.699 | -1.700 ~ .302 | -.843 | -1.989 ~ .302 | |
| **Lung function** | |  |  |  |  |  |  | |
| FVC, L | | .005 | -.025 ~ .035 | -.030 | -.098 ~ .038 | .033 | -.044 ~ .111 | |
| FVC, % | | -.342 | -0.992 ~ .308 | -1.500 | -2.967 ~ -.034 | -.216 | -1.916 ~ 1.485 | |
| FEV1, L | | .008 | -.019 ~ .035 | -.022 | -.084 ~ .040 | .032 | -.038 ~.103 | |
| FEV1, % | | -.322 | -0.964 ~ .320 | -1.315 | -2.768 ~ .137 | -.135 | -1.815 ~ 1.545 | |
| FEV1/FVC, % | | -.501 | -1.066 ~ .065 | -1.543 | -2.821 ~ -.265 | -.914 | -2.396 ~ .569 | |
| FEV1, % change | | -.075 | -.306 ~ .155 | .008 | -.518 ~ .534 | .339 | -.261 ~ .938 | |
| **ACT** | | -0.034 | -0.138 ~ 0.071 | 0.022 | -0.230 ~ 0.273 | 0.080 | | -0.217 ~ 0.377 |
| Late onset, atopy (N=159) | | | | | | | | |
| Mean level of O3 (ppb) | 1-month: 28.95 ± 7.01 | | | 6-month: 28.54 ± 3.64 | | 12-month: 29.08 ± 3.17 | | |
|  | | **β** | **Confidence Interval** | **β** | **Confidence Interval** | **β** | **Confidence Interval** | |
| Age of onset | | .060 | -.104 ~ .224 | -.166 | -.475 ~ .144 | -.174 | -.531 ~ .183 | |
| Asthma duration | | -.060 | -.224 ~ .104 | 0.166 | -.144 ~ .475 | .174 | -.183 ~ .531 | |
| **Blood tests** | |  |  |  |  |  |  | |
| IgE level, KU/L | | -1.357 | -16.653 ~ 13.940 | -11.792 | -40.651 ~ 17.067 | -10.113 | -43.378 ~ 23.152 | |
| Eosinophils, % | | .010 | -.050 ~ .070 | .051 | -.062 ~ .165 | .058 | -.072 ~ .189 | |
| Eosinophils, count | | 1.650 | -3.036 ~ 6.335 | 3.474 | -5.381 ~ 12.328 | 4.370 | -5.823 ~ 14.563 | |
| ECP | | .083 | -.148 ~ .313 | .254 | -.181 ~.689 | .135 | -.367 ~ .637 | |
| **Lung function** | |  |  |  |  |  |  | |
| FVC, L | | -.007 | -.028 ~ .013 | -.027 | -.066 ~ .011 | -.011 | -.056 ~ .033 | |
| FVC, % | | .049 | -0.505 ~ .603 | -.732 | -1.774 ~ .309 | -.170 | -1.376 ~ 1.037 | |
| FEV1, L | | -.010 | -.026 ~ .007 | -.029 | -.059 ~ .002 | -.017 | -.053 ~ .018 | |
| FEV1, % | | -.117 | -0.698 ~ .464 | -.991 | -2.078 ~ .097 | -0.506 | -1.768 ~.757 | |
| FEV1/FVC, % | | -.178 | -.615 ~ .258 | -.401 | -1.225 ~.423 | -.363 | -1.313 ~ .587 | |
| FEV1, % change | | -.156 | -.394 ~ .082 | -.067 | -.519 ~ 0.386 | -.238 | -.758 ~ .283 | |
| **ACT** | | -0.021 | -0.116 ~ 0.074 | -0.098 | -0.275 ~ 0.079 | 0.013 | | -0.193 ~ 0.219 |
| Early onset, non-atopy (N=103) | | | | | | | | |
| Mean level of O3 (ppb) | 1-month: 28.90 ± 7.32 | | | 6-month: 29.19 ± 3.31 | | 12-month: 29.29 ± 2.89 | | |
|  | | **β** | **Confidence Interval** | **β** | **Confidence Interval** | **β** | **Confidence Interval** | |
| Age of onset | | .178 | -.170 ~ .527 | .100 | -.671 ~ .872 | .308 | -.571 ~ 1.186 | |
| Asthma duration | | -.178 | -.527 ~ .170 | -.100 | -.872 ~ .671 | -.308 | -1.186 ~ 0.571 | |
| **Blood tests** | |  |  |  |  |  |  | |
| IgE level, KU/L | | 2.275 | -3.257 ~ 7.807 | 2.469 | -9.758 ~ 14.697 | -.085 | -14.045 ~ 13.874 | |
| Eosinophils, % | | .034 | -.025 ~ .094 | .031 | -.101 ~ .163 | .009 | -.142 ~ .160 | |
| Eosinophils, count | | 2.354 | -2.816 ~ 7.525 | 2.839 | -8.594 ~ 14.272 | 1.061 | -11.995 ~ 14.117 | |
| ECP | | -.490 | -1.018 ~ .038 | -.025 | -1.209 ~ 1.160 | -.415 | -1.764 ~ .934 | |
| **Lung function** | |  |  |  |  |  |  | |
| FVC, L | | -.006 | -.037 ~ .024 | .018 | -.049 ~ .086 | .025 | -.052 ~ .102 | |
| FVC, % | | -.131 | -.966 ~ .703 | .113 | -1.728 ~ 1.954 | .364 | -1.734 ~ 2.463 | |
| FEV1, L | | -.006 | -.031 ~ .019 | .023 | -.032 ~ .078 | .037 | -.026 ~ .099 | |
| FEV1, % | | -.187 | -1.003 ~ .628 | .428 | -1.370 ~ 2.226 | .944 | -1.101 ~ 2.989 | |
| FEV1/FVC, % | | -.139 | -.888 ~ .609 | 1.386 | -0.242 ~ 3.014 | 2.211 | .380 ~ 4.042 | |
| FEV1, % change | | .095 | -.315 ~ .504 | .465 | -.435 ~ 1.364 | .183 | -.848 ~ 1.214 | |
| **ACT** | | 0.030 | -0.079 ~ 0.140 | 0.119 | -0.118 ~ 0.355 | 0.263 | | -0.005 ~ 0.530 |
| Late onset, non-atopy (N=256) | | | | | | | | |
| Mean level of O3 (ppb) | 1-month: 30.61 ± 7.73 | | | 6-month: 29.10 ± 3.84 | | 12-month: 29.63 ± 3.39 | | |
|  | | **β** | **Confidence Interval** | **β** | **Confidence Interval** | **β** | **Confidence Interval** | |
| Age of onset | | -.025 | -.130 ~ .081 | -.107 | -.319 ~ .105 | -.121 | -.361 ~ .119 | |
| Asthma duration | | .025 | -.081 ~ .130 | .107 | -.105 ~ .319 | .121 | -.119 ~ .361 | |
| **Blood tests** | |  |  |  |  |  |  | |
| IgE level, KU/L | | 1.357 | -0.827 ~ 3.542 | 2.408 | -1.987 ~ 6.803 | 2.323 | -2.654 ~ 7.300 | |
| Eosinophils, % | | -.011 | -.050 ~ .029 | .039 | -.041 ~ .118 | .028 | -.061 ~ .118 | |
| Eosinophils, count | | 0.173 | -3.038 ~ 3.385 | 2.025 | -4.426 ~ 8.476 | 1.440 | -5.864 ~ 8.744 | |
| ECP | | .056 | -.179 ~ .291 | .239 | -.233 ~ .711 | .149 | -.387 ~ .684 | |
| **Lung function** | |  |  |  |  |  |  | |
| FVC, L | | -.006 | -.017 ~ .005 | -.015 | -.037 ~ .008 | -.008 | -.034 ~ .017 | |
| FVC, % | | .091 | -0.280 ~ .461 | -.517 | -1.259 ~ .226 | -.111 | -0.955 ~ .732 | |
| FEV1, L | | -.003 | -.012 ~ .006 | -.017 | -.036 ~ .001 | -0.011 | -0.033 ~ 0.010 | |
| FEV1, % | | .101 | -0.295 ~ .497 | -.689 | -1.481 ~ .103 | -.297 | -1.198 ~ .604 | |
| FEV1/FVC, % | | -.240 | -.589 ~ .110 | -.944 | -1.639 ~ -.249 | -.753 | -1.545 ~ .039 | |
| FEV1, % change | | -.064 | -.254 ~ .126 | -.060 | -.443 ~ .322 | -.008 | -.442 ~ .425 | |
| **ACT** | | -0.055 | -0.122 ~ 0.012 | -0.112 | -0.244 ~ 0.019 | -0.111 | | -0.261 ~ 0.038 |

**Definition of abbreviations:** EOA, early-onset asthma; LOA, late-onset asthma; ACT, asthma control test; IgE, immunoglobulin E; ECP, eosinophil cationic protein; FVC, forced vital capacity; FEV1, forced expiratory volume in 1 s; BD, bronchodilator; O3 = ozone
